# Supplementary material for: Melatonin promotes hair regeneration by modulating the Wnt/β‐catenin signalling pathway
Source: PubMed Central journal article supplement (PMC11503254; doi:10.1111/cpr.13656), 2024-05-21

# Supplementary Figure 1

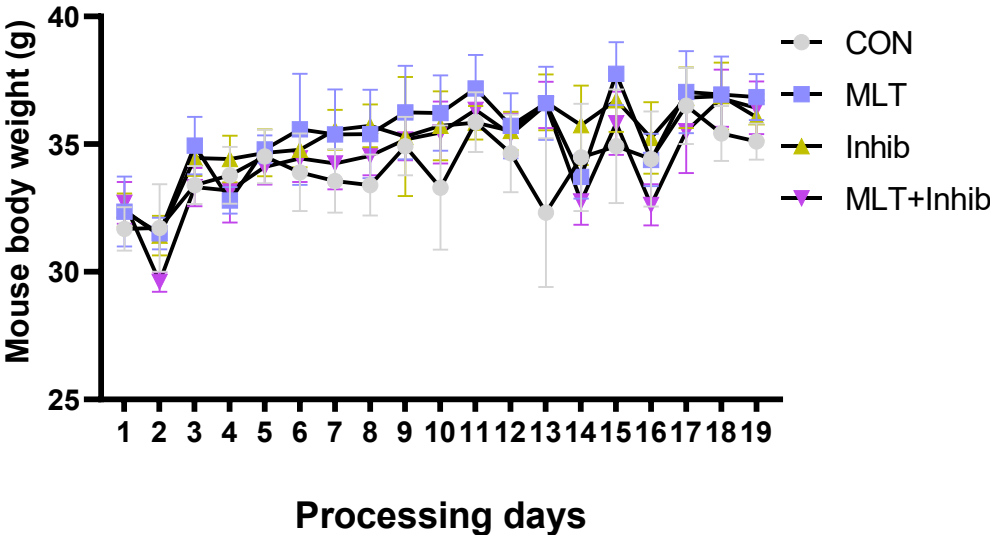

Supplement: CPR-57-e13656-s009.pdf [file CPR-57-e13656-s009.pdf]
